# Supplementary material for: Isostructural lanthanide oxalatophosphonates Ln(5pm8hqH3)(C2O4)1.5(H2O)·2H2O [Ln(iii) = Eu, Gd, Tb, Dy] (5pm8hqH3 = 5-phosphonomethyl-8-hydroxyquinoline): structures, magnetic and fluorescent properties
Source: Royal Society of Chemistry journal article supplement (doi:10.1039/c2ra20111a), 2012-01-01
Supplement: c2ra20111a.pdf [file c2ra20111a.pdf]

### The yield, elemental analyses, and IR data for compounds 1-4:

For compound **1**: Yield: 23.5 mg (40.7%). Anal. found (calcd) for C<sub>13</sub>H<sub>16</sub>O<sub>13</sub>NPEu: C, 26.83 (26.99); H, 2.82 (2.79); N, 2.41 (2.42)%. IR (KBr, cm<sup>-1</sup>): 3429(m, br), 1700(m), 1631(s), 1417(w), 1390(m), 1370(m), 1310(s), 1229(m), 1162(m), 1129(s), 1084(m), 1005(w), 949(w), 926(m), 851(w), 797(s), 772(m), 724(w), 698(w), 639(w), 555(w), 533(m), 494(m), 412(w).

For compound **2**: Yield: 20.9 mg (35.9%). Anal. found (calcd) for C<sub>13</sub>H<sub>16</sub>O<sub>13</sub>NPGd: C, 26.64 (26.76); H, 2.87 (2.77); N, 2.41 (2.40)%. IR (KBr, cm<sup>-1</sup>): 3436(m, br), 1701(m), 1629(s), 1557(m), 1390(w), 1369(m), 1309(m), 1228(w), 1168(w), 1128(m), 1084(m), 927(m), 851(w), 797(m), 770(m), 697(m), 639(m), 554(w), 533(w), 486(m), 419(w).

For compound **3**: Yield: 24.7 mg (42.2%). Anal. found (calcd) for C<sub>13</sub>H<sub>16</sub>O<sub>13</sub>NPTb: C, 26.62 (26.71); H, 2.76 (2.76); N, 2.47 (2.40)%. IR (KBr, cm<sup>-1</sup>): 3442(m), 3076(m, br), 1703(m), 1632(s), 1557(m), 1417(w), 1391(m), 1370(m), 1309(s), 1230(m), 1167(m), 1128(s), 1085(m), 1004(w), 928(m), 852(m), 798(s), 770(m), 722(w), 698(w), 640(m), 555(m), 533(m), 491(m), 413(w).

For compound **4**: Yield: 25.7 mg (43.7%). Anal. found (calcd) for C<sub>13</sub>H<sub>16</sub>O<sub>13</sub>NPDy: C, 26.49 (26.49); H, 2.88 (2.74); N, 2.38 (2.38)%. IR (KBr, cm<sup>-1</sup>): 3441(m), 3075(m, br), 1704(m), 1632(s), 1557(m), 1417(w), 1391(m), 1369(m), 1309(s), 1229(m), 1167(m), 1129(s), 1085(m), 1004(w), 950(w), 928(m), 852(m), 798(m), 769(m), 721(m), 698(m), 640(m), 555(w), 533(m), 489(m), 414(w).

**Table S1** The plane...plane distances and displacement angles of the aromatic stacking 8-hydroxyquinoline rings in **1-4** (these values are measured according to the related definitions in the paper: C. Janiak, *Dalton Trans.*, 2000, 3885.)

| compound                         | <b>1</b> | <b>2</b> | <b>3</b> | <b>4</b> |
|----------------------------------|----------|----------|----------|----------|
| plane...plane distance (Å)       | 3.220(1) | 3.213(1) | 3.202(1) | 3.218(1) |
| centroid...centroid distance (Å) | 3.643(1) | 3.640(1) | 3.635(1) | 3.639(1) |
| displacement angle (°)           | 27.8(1)  | 28.0(1)  | 28.2(1)  | 27.8(1)  |

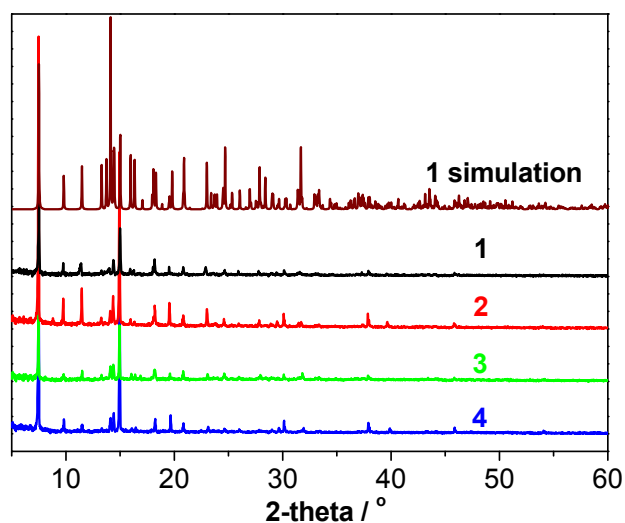

**Fig. S1** Experimental XRD patterns for 1-4 and the simulated XRD pattern of 1

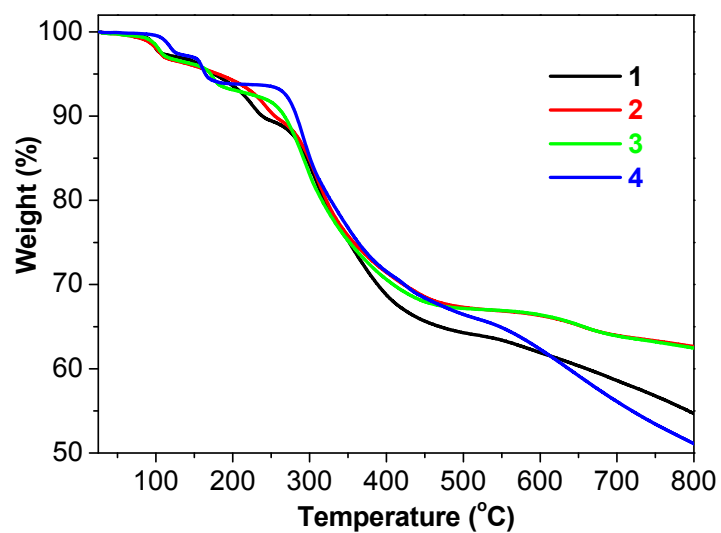

**Fig. S2** TG curves of compounds 1-4

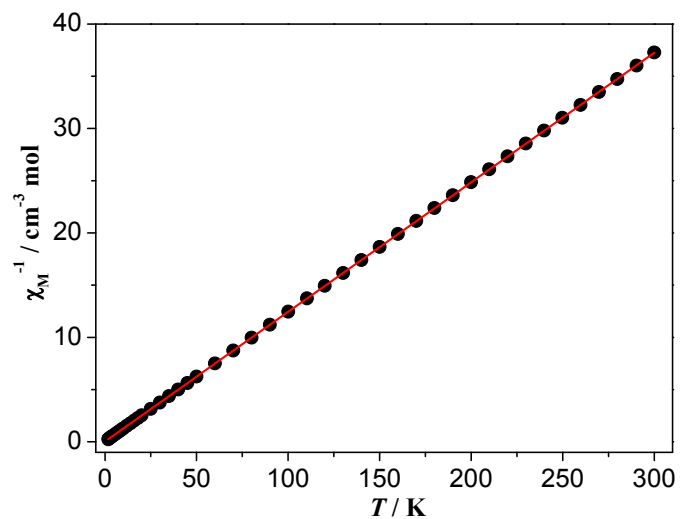

**Fig. S3** The  $\chi_M^{-1}$  vs.  $T$  plot for **2**

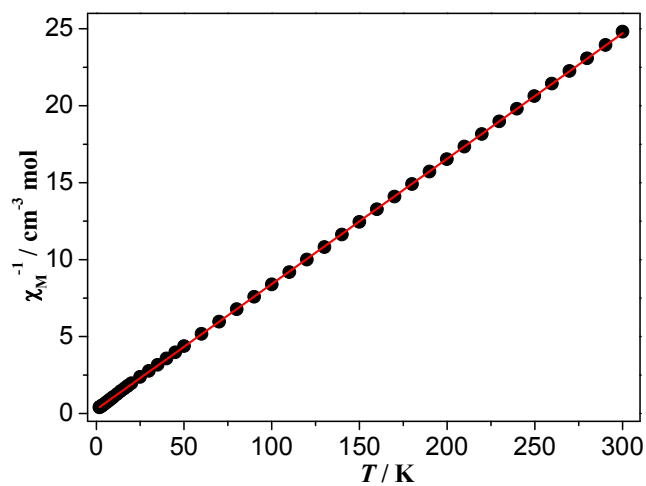

**Fig. S4** The  $\chi_M^{-1}$  vs.  $T$  plot for **3**

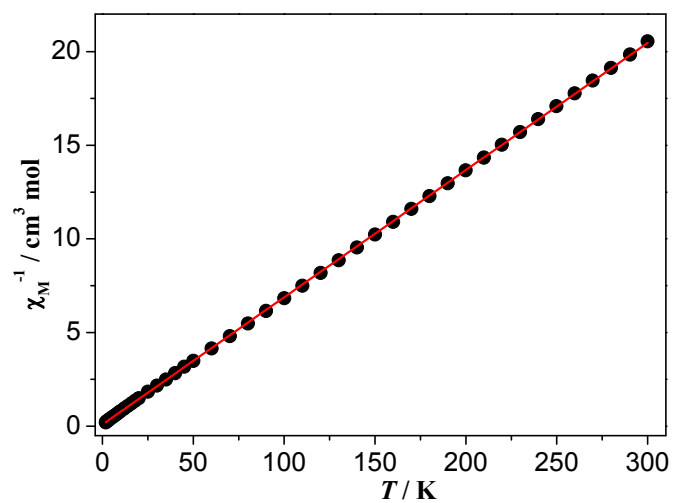

**Fig. S5** The  $\chi_M^{-1}$  vs.  $T$  plot for **4**
